# Supplementary material for: Cost and greenhouse gas emissions of current, healthy, flexitarian and vegan diets in Aotearoa (New Zealand)
Source: HighWire-hosted journal article supplement (doi:10.1136/bmjnph-2021-000262), 2021-06-01
Supplement: bmjnph-2021-000262supp001_data_supplement.pdf [file bmjnph-2021-000262supp001_data_supplement.pdf]

## Supplementary Files

**Table 4: Summary of fortnightly diet outputs generated in DIETCOST**

| Diet Scenario      |          | Common foods used (N) | Individual diet outputs (N) | Mean Energy (kJ/day) | Household diet outputs (N) |
|--------------------|----------|-----------------------|-----------------------------|----------------------|----------------------------|
| <b>Current</b>     | <i>G</i> | 106                   | 237                         | 7285                 | 237                        |
|                    | <i>B</i> |                       | 242                         | 13956                |                            |
|                    | <i>M</i> |                       | 237                         | 12569                |                            |
|                    | <i>W</i> |                       | 238                         | 9488                 |                            |
| <b>Healthy</b>     | <i>G</i> | 105                   | 236                         | 6859                 | 219                        |
|                    | <i>B</i> |                       | 225                         | 12742                |                            |
|                    | <i>M</i> |                       | 219                         | 11274                |                            |
|                    | <i>W</i> |                       | 220                         | 9046                 |                            |
| <b>Flexitarian</b> | <i>G</i> | 62                    | 253                         | 6613                 | 211                        |
|                    | <i>B</i> |                       | 222                         | 12576                |                            |
|                    | <i>M</i> |                       | 242                         | 10992                |                            |
|                    | <i>W</i> |                       | 211                         | 8789                 |                            |
| <b>Vegan</b>       | <i>G</i> | 66                    | 210                         | 6666                 | 210                        |
|                    | <i>B</i> |                       | 221                         | 12650                |                            |
|                    | <i>M</i> |                       | 229                         | 11052                |                            |
|                    | <i>W</i> |                       | 232                         | 8848                 |                            |

*G* = Girl; *B* = Boy; *W* = Woman; *M* = Man

**Table 5: Mean Nutrient intake of household members across fortnightly diet outputs**

| Diet Scenario      |          | % Energy |               |              |         | Sodium mg | Fibre g |
|--------------------|----------|----------|---------------|--------------|---------|-----------|---------|
|                    |          | Fat      | Saturated Fat | Carbohydrate | Protein |           |         |
| <b>Current</b>     | <i>G</i> | 37       | 13            | 49           | 14      | 33323     | 254     |
|                    | <i>B</i> | 35       | 11            | 48           | 16      | 63852     | 342     |
|                    | <i>M</i> | 38       | 12            | 43           | 19      | 60677     | 355     |
|                    | <i>W</i> | 37       | 13            | 43           | 20      | 43614     | 316     |
| <b>Healthy</b>     | <i>G</i> | 23       | 7             | 57           | 19      | 17691     | 380     |
|                    | <i>B</i> | 27       | 8             | 53           | 19      | 30675     | 748     |
|                    | <i>M</i> | 26       | 8             | 54           | 19      | 30340     | 654     |
|                    | <i>W</i> | 25       | 8             | 54           | 20      | 27355     | 516     |
| <b>Flexitarian</b> | <i>G</i> | 36       | 7             | 44           | 19      | 13573     | 553     |
|                    | <i>B</i> | 38       | 7             | 41           | 18      | 25380     | 1036    |
|                    | <i>M</i> | 36       | 7             | 42           | 19      | 24101     | 938     |
|                    | <i>W</i> | 35       | 7             | 43           | 19      | 20584     | 752     |
| <b>Vegan</b>       | <i>G</i> | 40       | 6             | 40           | 16      | 10436     | 592     |
|                    | <i>B</i> | 42       | 6             | 38           | 16      | 21008     | 1094    |
|                    | <i>M</i> | 42       | 6             | 38           | 17      | 20153     | 987     |
|                    | <i>W</i> | 40       | 6             | 40           | 17      | 18007     | 798     |

**Table 6: Substitution of common foods among the four dietary scenarios. Adapted from Mackay<sup>31</sup>**

| <b>Food group</b>                                | <b><i>Current</i></b>         | <b><i>Healthy</i></b>                                          | <b><i>Flexitarian</i></b>                                      | <b><i>Vegan</i></b>                                            |
|--------------------------------------------------|-------------------------------|----------------------------------------------------------------|----------------------------------------------------------------|----------------------------------------------------------------|
| Grains                                           | White bread                   | Multigrain bread                                               | Multigrain bread                                               | Multigrain bread                                               |
|                                                  | White rice                    | Brown rice                                                     | Brown rice                                                     | Brown rice                                                     |
|                                                  | Plain pasta                   | Wholemeal pasta                                                | Wholemeal pasta                                                | Wholemeal pasta                                                |
| Dairy/dairy alternatives                         | Regular milk                  | Low-fat milk                                                   | Low-fat milk                                                   | Almond/Soy milk                                                |
|                                                  | Full-fat sweetened yoghurt    | Low-fat plain yoghurt                                          | Low-fat plain yoghurt                                          | Soy yoghurt                                                    |
|                                                  | Colby Cheese                  | Edam Cheese                                                    | Edam Cheese                                                    | NA                                                             |
| Meat, poultry, seafood, nuts, legumes, and seeds | Corned beef                   | Blade steak                                                    | Neck chops                                                     | Masala burger patty                                            |
|                                                  | Chicken drumsticks            | Chicken breast, no skin                                        | Chicken breast, no skin                                        | Four Bean Mix                                                  |
|                                                  | Salted peanuts                | Unsalted peanuts                                               | Unsalted peanuts                                               | Unsalted peanuts                                               |
| Beverages                                        | Regular soda                  | Diet soda                                                      | NA                                                             | NA                                                             |
|                                                  | Fruit drink                   | Water                                                          | Water                                                          | Water                                                          |
| Fruit                                            | Peaches canned in light syrup | Lite peaches canned with no added sugar (artificial sweetener) | Lite peaches canned with no added sugar (artificial sweetener) | Lite peaches canned with no added sugar (artificial sweetener) |
| Vegetables                                       | Tomatoes canned, added salt   | Tomatoes canned, no added salt                                 | Tomatoes canned, no added salt                                 | Tomatoes canned, no added salt                                 |
| Fats                                             | Butter                        | Margarine                                                      | Canola/Olive oil                                               | Canola/Olive oil                                               |
| Other                                            | Peanut butter, added salt     | Peanut butter, no added salt or sugar                          | Peanut butter, no added salt or sugar                          | Peanut butter, no added salt or sugar                          |
|                                                  | Tomato sauce, regular         | Tomato sauce, lite                                             | Salsa                                                          | Salsa                                                          |

**Table 7: List and quantities of common foods among the four dietary scenarios. Adapted from Mackay<sup>31</sup>**

| <b>Current Diet</b>            |                       |                                                     |                    |                        |                        |
|--------------------------------|-----------------------|-----------------------------------------------------|--------------------|------------------------|------------------------|
| <b>Common foods</b>            | <b>Serve size (g)</b> | <b>Total number of serves per fortnight (range)</b> |                    |                        |                        |
|                                |                       | <b>Adult man</b>                                    | <b>Adult woman</b> | <b>14-year old boy</b> | <b>7-year old girl</b> |
| <b>FRUIT</b>                   |                       |                                                     |                    |                        |                        |
| Kiwifruit, fresh               | 120                   | 16-20                                               | 18-22              | 14-18                  | 22-26                  |
| Bananas, fresh                 |                       |                                                     |                    |                        |                        |
| Apples, fresh                  |                       |                                                     |                    |                        |                        |
| Peaches, canned no added sugar |                       |                                                     |                    |                        |                        |
| Mandarins, fresh               |                       |                                                     |                    |                        |                        |
| Oranges, fresh                 |                       |                                                     |                    |                        |                        |
| Pears, fresh                   |                       |                                                     |                    |                        |                        |
| Canned fruit salad in syrup    |                       |                                                     |                    |                        |                        |
| <b>VEGETABLES</b>              |                       |                                                     |                    |                        |                        |
| Broccoli, fresh                | 75                    | 46-54                                               | 48-56              | 38-46                  | 30-38                  |
| Cabbage, fresh                 |                       |                                                     |                    |                        |                        |
| Carrots, fresh                 |                       |                                                     |                    |                        |                        |
| Cauliflower, fresh             |                       |                                                     |                    |                        |                        |
| Cucumber, fresh                |                       |                                                     |                    |                        |                        |
| Lettuce, fresh                 |                       |                                                     |                    |                        |                        |
| Mixed vegetables, frozen       |                       |                                                     |                    |                        |                        |
| Onions, fresh                  |                       |                                                     |                    |                        |                        |
| Silverbeet, fresh              |                       |                                                     |                    |                        |                        |
| Tomatoes, fresh                |                       |                                                     |                    |                        |                        |

|                                                |     |       |       |       |       |
|------------------------------------------------|-----|-------|-------|-------|-------|
| Vegetable soup, canned                         |     |       |       |       |       |
| Taro leaves                                    |     |       |       |       |       |
| Garlic, fresh                                  | 5   |       |       |       |       |
| <b>STARCHY VEGETABLES</b>                      |     |       |       |       |       |
| Kumara, fresh                                  | 135 | 2-8   | 2-8   | 0-8   | 0-8   |
| Potatoes, fresh                                |     |       |       |       |       |
| Potato fries, frozen, superfries, straight cut |     |       |       |       |       |
| Pumpkin, fresh                                 |     |       |       |       |       |
| Cassava, frozen                                |     |       |       |       |       |
| Taro                                           |     |       |       |       |       |
| Green banana                                   |     |       |       |       |       |
| <b>GRAINS</b>                                  |     |       |       |       |       |
| Bread, white                                   | 65  | 78-94 | 58-78 | 80-96 | 40-56 |
| Bread, wheatmeal                               |     |       |       |       |       |
| Bread, multigrain                              |     |       |       |       |       |
| Cornflakes                                     |     |       |       |       |       |
| Muesli, toasted                                |     |       |       |       |       |
| Weetbix                                        |     |       |       |       |       |
| Rolled oats                                    |     |       |       |       |       |
| Pasta regular                                  |     |       |       |       |       |
| Rice, long grain, white                        |     |       |       |       |       |
| Spaghetti, canned                              |     |       |       |       |       |
| Crackers, cabin bread                          |     |       |       |       |       |
| Vermicelli                                     |     |       |       |       |       |
| Quick noodles, 2 minutes                       |     |       |       |       |       |
| Cocoa puffs                                    |     |       |       |       |       |

|                             |     |       |       |       |       |
|-----------------------------|-----|-------|-------|-------|-------|
| Cake, chocolate             |     |       |       |       |       |
| Pineapple pie               |     |       |       |       |       |
| Biscuits, arrowroot         | 30  |       |       |       |       |
| Donut                       |     |       |       |       |       |
| Coconut cream buns          |     |       |       |       |       |
| <b>DAIRY/ALTERNATIVES</b>   |     |       |       |       |       |
| Cheese, Colby               | 40  |       |       |       |       |
| Cheese, Edam                |     |       |       |       |       |
| Milk, trim                  | 250 | 16-20 | 16-20 | 20-24 | 20-24 |
| Milk, standard              |     |       |       |       |       |
| Yoghurt, full-fat flavoured |     |       |       |       |       |
| <b>PROTEIN FOODS</b>        |     |       |       |       |       |
| Beef, corned silverside     | 100 | 36-44 | 20-28 | 24-32 | 14-22 |
| Beef steak, blade           |     |       |       |       |       |
| Beef, mince                 |     |       |       |       |       |
| Chicken, whole, pre-cooked  |     |       |       |       |       |
| Chicken drumstick           |     |       |       |       |       |
| Lamb shoulder chops         |     |       |       |       |       |
| Pork leg roast              |     |       |       |       |       |
| Fish fillets, fresh         |     |       |       |       |       |
| Tuna, canned in oil         |     |       |       |       |       |
| Fish fillets, frozen        |     |       |       |       |       |
| Corned beef regular         |     |       |       |       |       |
| Lamb mutton flaps           |     |       |       |       |       |
| Sausages                    |     |       |       |       |       |
| Luncheon sausage            |     |       |       |       |       |

|                                           |     |       |       |       |       |
|-------------------------------------------|-----|-------|-------|-------|-------|
| Corned beef regular                       |     |       |       |       |       |
| Lamb mutton flaps                         |     |       |       |       |       |
| Baked Beans regular                       | 135 |       |       |       |       |
| Chickpeas, canned                         |     |       |       |       |       |
| Eggs                                      | 50  |       |       |       |       |
| peanuts, salted                           |     |       |       |       |       |
| Bacon, middle rashers                     |     |       |       |       |       |
| Ham, sliced or shaved                     |     |       |       |       |       |
| <b>FATS &amp; OILS</b>                    |     |       |       |       |       |
| Butter                                    | 15  |       |       |       |       |
| Margarine, monounsaturated regular fat    |     |       |       |       |       |
| Olive oil                                 |     | 22-34 | 18-26 | 20-32 | 18-26 |
| Canola oil                                | 10  |       |       |       |       |
| Coconut cream regular                     |     |       |       |       |       |
| <b>DISCRETIONARY FOODS</b>                |     |       |       |       |       |
| Chocolate, dairy milk block               | 50  |       |       |       |       |
| Sweets - gum, jelly soft                  |     |       |       |       |       |
| Potato crisps, regular cut                |     |       |       |       |       |
| Ice cream, plain                          | 60  |       |       |       |       |
| Muesli Bar, fruit nut choc                | 40  |       |       |       |       |
| Pasta sauce                               | 125 | 46-68 | 22-32 | 54-82 | 40-60 |
| Tomato sauce                              | 15  |       |       |       |       |
| Mayonnaise, regular                       |     |       |       |       |       |
| White sugar                               | 5   |       |       |       |       |
| Jam, strawberry                           | 10  |       |       |       |       |
| <b>SAUCES, DRESSINGS, SPREADS, SUGARS</b> |     |       |       |       |       |

|                           |     |        |        |        |       |
|---------------------------|-----|--------|--------|--------|-------|
| Peanut butter, added salt | 15  | 88-132 | 82-124 | 68-102 | 28-42 |
| Tomato sauce              |     |        |        |        |       |
| Soy sauce regular         |     |        |        |        |       |
| Marmite                   |     |        |        |        |       |
| <b>BEVERAGES</b>          |     |        |        |        |       |
| Milo, powder              | 250 | 12-16  | 8-10   | 14-22  | 8-10  |
| Cola                      |     |        |        |        |       |
| Diet cola                 |     |        |        |        |       |
| Fruit drink orange        |     |        |        |        |       |
| Orange juice              |     |        |        |        |       |
| Energy drink              |     |        |        |        |       |
| Soft drink powder         |     |        |        |        |       |
| <b>TAKEAWAYS</b>          | 0   |        |        |        |       |
| <b>ALCOHOL</b>            | 0   |        |        |        |       |
| <b>SUPPLEMENT</b>         | 0   |        |        |        |       |

| <b>Healthy Diet</b>            |            |                                               |             |                 |                 |
|--------------------------------|------------|-----------------------------------------------|-------------|-----------------|-----------------|
| Common foods                   | Serve size | Total number of serves per fortnight (target) |             |                 |                 |
|                                |            | Adult man                                     | Adult woman | 14-year old boy | 7-year old girl |
| <b>FRUIT</b>                   |            |                                               |             |                 |                 |
| Kiwifruit, fresh               | 120        | 28-42                                         | 28-42       | 28-42           | 28-42           |
| Bananas, fresh                 |            |                                               |             |                 |                 |
| Apples, fresh                  |            |                                               |             |                 |                 |
| Peaches, canned no added sugar |            |                                               |             |                 |                 |
| Mandarins, fresh               |            |                                               |             |                 |                 |
| Oranges, fresh                 |            |                                               |             |                 |                 |



|                            |     |       |       |       |       |
|----------------------------|-----|-------|-------|-------|-------|
| Pears, fresh               |     |       |       |       |       |
| <b>VEGETABLES</b>          |     |       |       |       |       |
| Avocados, fresh            | 75  | 28-56 | 28-56 | 28-56 | 14-42 |
| Broccoli, fresh            |     |       |       |       |       |
| Cabbage, fresh             |     |       |       |       |       |
| Carrots, fresh             |     |       |       |       |       |
| Cauliflower, fresh         |     |       |       |       |       |
| Corn, frozen               |     |       |       |       |       |
| Cucumber, fresh            |     |       |       |       |       |
| Lettuce, fresh             |     |       |       |       |       |
| Mixed vegetables, frozen   |     |       |       |       |       |
| Onions, fresh              |     |       |       |       |       |
| Peas, frozen               |     |       |       |       |       |
| Silverbeet, fresh          |     |       |       |       |       |
| Tomatoes, fresh            |     |       |       |       |       |
| Tomatoes, canned, low salt |     |       |       |       |       |
| Taro leaves                |     |       |       |       |       |
| Garlic, fresh              | 5   |       |       |       |       |
| <b>STARCHY VEGETABLES</b>  |     |       |       |       |       |
| Kumara, fresh              | 135 | 14-28 | 14-28 | 14-28 | 14-28 |
| Potatoes, fresh            |     |       |       |       |       |
| Pumpkin, fresh             |     |       |       |       |       |
| Cassava, frozen            |     |       |       |       |       |
| Taro                       |     |       |       |       |       |
| Green banana               |     |       |       |       |       |
| <b>GRAINS</b>              |     |       |       |       |       |

|                                 |     |        |        |        |        |
|---------------------------------|-----|--------|--------|--------|--------|
| Bread, white                    |     |        |        |        |        |
| Bread, wheatmeal                |     |        |        |        |        |
| Bread, multigrain               |     |        |        |        |        |
| Cornflakes                      |     |        |        |        |        |
| Muesli, toasted                 |     |        |        |        |        |
| Weetbix                         |     |        |        |        |        |
| Rolled oats                     |     |        |        |        |        |
| Pasta regular                   | 65  | 84-168 | 84-168 | 70-168 | 56-112 |
| Pasta wholemeal                 |     |        |        |        |        |
| Rice, long grain, white         |     |        |        |        |        |
| Rice, brown                     |     |        |        |        |        |
| Spaghetti, canned, lite         |     |        |        |        |        |
| Crackers, cabin bread           |     |        |        |        |        |
| Vermicelli                      |     |        |        |        |        |
| <b>DAIRY/ALTERNATIVES</b>       |     |        |        |        |        |
| Cheese, Colby                   | 40  |        |        |        |        |
| Cheese, Edam                    |     |        |        |        |        |
| Milk, trim                      | 270 | 28-56  | 28-56  | 42-70  | 28-56  |
| Milk, standard                  |     |        |        |        |        |
| Yoghurt, reduced fat, flavoured | 150 |        |        |        |        |
| <b>PROTEIN FOODS</b>            |     |        |        |        |        |
| Eggs                            | 50  |        |        |        |        |
| Peanuts, plain                  |     |        |        |        |        |
| Almonds, plain                  |     | 28-56  | 28-56  | 28-56  | 14-42  |
| Beef, corned silverside         | 100 |        |        |        |        |
| Beef steak, rump                |     |        |        |        |        |

|                             |     |      |      |      |      |
|-----------------------------|-----|------|------|------|------|
| Chicken, whole, pre-cooked  |     |      |      |      |      |
| Chicken drumstick           |     |      |      |      |      |
| Lamb shoulder chops         |     |      |      |      |      |
| Pork leg roast              |     |      |      |      |      |
| Fish fillets, fresh         |     |      |      |      |      |
| Tuna, canned in water       |     |      |      |      |      |
| Fish fillets, frozen        |     |      |      |      |      |
| Beef, mince lean            |     |      |      |      |      |
| Chickpeas, canned           | 135 |      |      |      |      |
| Baked Beans 50% less sugar  |     |      |      |      |      |
| <b>FATS &amp; OILS</b>      |     |      |      |      |      |
| Margarine, mufa regular fat | 15  |      |      |      |      |
| Olive oil                   |     | 2-32 | 2-30 | 8-50 | 8-24 |
| Canola oil                  | 10  |      |      |      |      |
| coconut cream lite          |     |      |      |      |      |
| <b>DISCRETIONARY FOODS</b>  |     |      |      |      |      |
| Chocolate, dairy milk block |     |      |      |      |      |
| Sweets - gum, jelly soft    |     |      |      |      |      |
| Bacon, middle rashers       | 50  |      |      |      |      |
| Ham, sliced or shaved       |     |      |      |      |      |
| Ice cream, plain            | 60  | 2-10 | 2-10 | 4-16 | 2-10 |
| Muesli Bar, fruit nut choc  | 40  |      |      |      |      |
| Potato crisps, regular cut  | 135 |      |      |      |      |
| Cake, fruit                 |     |      |      |      |      |
| Pineapple pie               | 65  |      |      |      |      |
| Quick noodles, 2 minutes    |     |      |      |      |      |

|                                           |     |      |      |      |      |
|-------------------------------------------|-----|------|------|------|------|
| Cocoa puffs                               |     |      |      |      |      |
| Biscuits, arrowroot                       |     |      |      |      |      |
| Donut                                     | 30  |      |      |      |      |
| Coconut cream buns                        |     |      |      |      |      |
| Sausages                                  |     |      |      |      |      |
| Luncheon sausage                          | 100 |      |      |      |      |
| lamb mutton flaps                         |     |      |      |      |      |
| corned beef regular                       |     |      |      |      |      |
| Jam, strawberry                           | 10  |      |      |      |      |
| Pasta sauce                               | 125 |      |      |      |      |
| Mayonnaise, regular                       | 15  |      |      |      |      |
| White sugar                               | 5   |      |      |      |      |
| <b>SAUCES, DRESSINGS, SPREADS, SUGARS</b> |     |      |      |      |      |
| Peanut butter, no added salt or sugar     |     |      |      |      |      |
| Tomato sauce, lite                        | 15  | 2-36 | 2-30 | 2-42 | 2-30 |
| Soy sauce reduced salt                    |     |      |      |      |      |
| <b>BEVERAGES</b>                          |     |      |      |      |      |
| Milo, powder                              | 20  |      |      |      |      |
| Soft drink powder                         | 15  |      |      |      |      |
| Cola                                      |     |      |      |      |      |
| Diet cola                                 |     | 6-8  | 6-8  | 6-10 | 6-10 |
| Fruit drink orange                        | 250 |      |      |      |      |
| Orange juice                              |     |      |      |      |      |
| Energy drink                              |     |      |      |      |      |
| <b>TAKEAWAYS</b>                          | 0   |      |      |      |      |
| <b>ALCOHOL</b>                            | 0   |      |      |      |      |

|                   |   |  |  |  |  |
|-------------------|---|--|--|--|--|
| <b>SUPPLEMENT</b> | 0 |  |  |  |  |
|-------------------|---|--|--|--|--|

| <b>Flexitarian - Planetary Diet</b> |                   |                                                     |                    |                        |                        |
|-------------------------------------|-------------------|-----------------------------------------------------|--------------------|------------------------|------------------------|
| <b>Common foods</b>                 | <b>Serve size</b> | <b>Total number of serves per fortnight (range)</b> |                    |                        |                        |
|                                     |                   | <b>Adult man</b>                                    | <b>Adult woman</b> | <b>14-year old boy</b> | <b>7-year old girl</b> |
| <b>FRUIT</b>                        |                   |                                                     |                    |                        |                        |
| Kiwifruit, fresh                    | 120               | 24-46                                               | 24-46              | 24-46                  | 24-46                  |
| Bananas, fresh                      |                   |                                                     |                    |                        |                        |
| Apples, fresh                       |                   |                                                     |                    |                        |                        |
| Peaches, canned no added sugar      |                   |                                                     |                    |                        |                        |
| Mandarins, fresh                    |                   |                                                     |                    |                        |                        |
| Oranges, fresh                      |                   |                                                     |                    |                        |                        |
| Pears, fresh                        |                   |                                                     |                    |                        |                        |
| <b>VEGETABLES</b>                   |                   |                                                     |                    |                        |                        |
| Tomatoes, canned, low salt          | 75                | 56-112                                              | 56-112             | 56-112                 | 56-112                 |
| Broccoli, fresh                     |                   |                                                     |                    |                        |                        |
| Tomatoes, fresh                     |                   |                                                     |                    |                        |                        |
| Cucumber, fresh                     |                   |                                                     |                    |                        |                        |
| Stir Fry Vegetables, frozen         |                   |                                                     |                    |                        |                        |
| Cauliflower, fresh                  |                   |                                                     |                    |                        |                        |
| Avocados, fresh                     |                   |                                                     |                    |                        |                        |
| Courgettes, fresh                   |                   |                                                     |                    |                        |                        |
| Lettuce, fresh                      |                   |                                                     |                    |                        |                        |
| Mushrooms, fresh                    |                   |                                                     |                    |                        |                        |
| Spinach, frozen                     |                   |                                                     |                    |                        |                        |
| Cabbage, fresh                      |                   |                                                     |                    |                        |                        |
| Capsicums, fresh                    |                   |                                                     |                    |                        |                        |
| Onions, fresh                       |                   |                                                     |                    |                        |                        |

| <b>STARCHY VEGETABLES</b> |     |       |       |       |       |
|---------------------------|-----|-------|-------|-------|-------|
| Kumara, fresh             | 135 | 6-10  | 6-10  | 6-10  | 6-10  |
| Potatoes, fresh           |     |       |       |       |       |
| Pumpkin, fresh            |     |       |       |       |       |
| Carrots, fresh            |     |       |       |       |       |
| <b>GRAINS</b>             |     |       |       |       |       |
| Weetbix                   | 65  | 50-66 | 50-66 | 42-66 | 34-44 |
| Bread, multigrain         |     |       |       |       |       |
| Pasta wholemeal           |     |       |       |       |       |
| Couscous, wholemeal wheat |     |       |       |       |       |
| Bread, wheatmeal          |     |       |       |       |       |
| Rolled oats               |     |       |       |       |       |
| Mixed grain crackers      |     |       |       |       |       |
| Pita bread, wholemeal     |     |       |       |       |       |
| Muesli, toasted           |     |       |       |       |       |
| Rice, brown               |     |       |       |       |       |
| Corn Chips                |     |       |       |       |       |
| Mixed Grain Crispbread    |     |       |       |       |       |
| <b>DAIRY/ALTERNATIVES</b> |     |       |       |       |       |
| Yoghurt, natural, low-fat | 150 | 12-26 | 12-26 | 16-32 | 12-26 |
| Milk, trim                | 270 |       |       |       |       |
| Cheese, Edam              | 40  |       |       |       |       |
| <b>PROTEIN FOODS</b>      |     |       |       |       |       |
| Pork leg roast            | 100 | 48-98 | 48-98 | 48-98 | 24-72 |
| Lamb shoulder chops       |     |       |       |       |       |
| Fish fillets, fresh       |     |       |       |       |       |

|                                           |    |       |       |       |       |  |
|-------------------------------------------|----|-------|-------|-------|-------|--|
| Black Beans Canned                        |    |       |       |       |       |  |
| Chicken breast fresh                      |    |       |       |       |       |  |
| Pumpkin seeds                             | 50 |       |       |       |       |  |
| Hummus dip                                |    |       |       |       |       |  |
| Almonds, plain                            |    |       |       |       |       |  |
| Sunflower seeds                           |    |       |       |       |       |  |
| Eggs                                      |    |       |       |       |       |  |
| Peanuts, plain                            |    |       |       |       |       |  |
| Peanut butter, no added salt or sugar     |    |       |       |       |       |  |
| Baked Beans 50% less sugar                |    | 135   |       |       |       |  |
| Lentils, canned in springwater            |    | 150   |       |       |       |  |
| Red Kidney Beans, canned                  |    |       |       |       |       |  |
| Chickpeas, canned                         |    |       |       |       |       |  |
| Tofu                                      |    |       |       |       |       |  |
| Middle Eastern Falafel Lisa               |    |       |       |       |       |  |
| <b>FATS &amp; OILS</b>                    |    |       |       |       |       |  |
| Olive oil                                 | 10 | 14-30 | 14-30 | 14-30 | 14-30 |  |
| Canola oil                                |    |       |       |       |       |  |
| <b>DISCRETIONARY FOODS</b>                | 0  |       |       |       |       |  |
| <b>SAUCES, DRESSINGS, SPREADS, SUGARS</b> |    |       |       |       |       |  |
| Marmite                                   | 15 | 0-28  | 0-28  | 0-28  | 0-28  |  |
| Mild Salsa                                |    |       |       |       |       |  |
| <b>BEVERAGES</b>                          | 0  |       |       |       |       |  |
| <b>TAKEAWAYS</b>                          | 0  |       |       |       |       |  |
| <b>ALCOHOL</b>                            | 0  |       |       |       |       |  |
| <b>SUPPLEMENT</b>                         | 0  |       |       |       |       |  |



| <b>Vegan - Planetary Diet</b>  |                   |                                                     |                    |                        |                        |
|--------------------------------|-------------------|-----------------------------------------------------|--------------------|------------------------|------------------------|
| <b>Common foods</b>            | <b>Serve size</b> | <b>Total number of serves per fortnight (range)</b> |                    |                        |                        |
|                                |                   | <b>Adult man</b>                                    | <b>Adult woman</b> | <b>14-year old boy</b> | <b>7-year old girl</b> |
| <b>FRUIT</b>                   |                   |                                                     |                    |                        |                        |
| Kiwifruit, fresh               | 120               | 24-46                                               | 24-46              | 24-46                  | 24-46                  |
| Bananas, fresh                 |                   |                                                     |                    |                        |                        |
| Apples, fresh                  |                   |                                                     |                    |                        |                        |
| Peaches, canned no added sugar |                   |                                                     |                    |                        |                        |
| Mandarins, fresh               |                   |                                                     |                    |                        |                        |
| Oranges, fresh                 |                   |                                                     |                    |                        |                        |
| Pears, fresh                   |                   |                                                     |                    |                        |                        |
| <b>VEGETABLES</b>              |                   |                                                     |                    |                        |                        |
| Tomatoes, canned, low salt     | 75                | 56-112                                              | 56-112             | 56-112                 | 56-112                 |
| Tomatoes, fresh                |                   |                                                     |                    |                        |                        |
| Cucumber, fresh                |                   |                                                     |                    |                        |                        |
| Stir Fry Vegetables, frozen    |                   |                                                     |                    |                        |                        |
| Cauliflower, fresh             |                   |                                                     |                    |                        |                        |
| Avocados, fresh                |                   |                                                     |                    |                        |                        |
| Courgettes, fresh              |                   |                                                     |                    |                        |                        |
| Lettuce, fresh                 |                   |                                                     |                    |                        |                        |
| Mushrooms, fresh               |                   |                                                     |                    |                        |                        |
| Spinach, frozen                |                   |                                                     |                    |                        |                        |
| Cabbage, fresh                 |                   |                                                     |                    |                        |                        |
| Capsicums, fresh               |                   |                                                     |                    |                        |                        |
| Onions, fresh                  |                   |                                                     |                    |                        |                        |

| <b>STARCHY VEGETABLES</b>        |     |       |       |       |       |
|----------------------------------|-----|-------|-------|-------|-------|
| Kumara, fresh                    | 135 | 6-10  | 6-10  | 6-10  | 6-10  |
| Potatoes, fresh                  |     |       |       |       |       |
| Pumpkin, fresh                   |     |       |       |       |       |
| Carrots, fresh                   |     |       |       |       |       |
| <b>GRAINS</b>                    |     |       |       |       |       |
| Weetbix                          | 65  | 50-66 | 50-66 | 42-66 | 34-44 |
| Bread, multigrain                |     |       |       |       |       |
| Pasta wholemeal                  |     |       |       |       |       |
| Couscous, wholemeal wheat        |     |       |       |       |       |
| Bread, wheatmeal                 |     |       |       |       |       |
| Rolled oats                      |     |       |       |       |       |
| Mixed grain crackers             |     |       |       |       |       |
| Pita bread, wholemeal            |     |       |       |       |       |
| Muesli, toasted                  |     |       |       |       |       |
| Rice, brown                      |     |       |       |       |       |
| Corn Chips                       |     |       |       |       |       |
| Wholegrain burger bun            |     |       |       |       |       |
| Spaghetti Pasta, wholemeal       |     |       |       |       |       |
| Mixed Grain Crispbread           |     |       |       |       |       |
| <b>DAIRY/ALTERNATIVES</b>        |     |       |       |       |       |
| Almond milk                      | 270 | 18-36 | 18-36 | 24-44 | 18-36 |
| Soy yoghurt with berries         | 150 |       |       |       |       |
| Soy yoghurt with mango and peach |     |       |       |       |       |
| Soy milk                         | 270 |       |       |       |       |
| <b>PROTEIN FOODS</b>             |     |       |       |       |       |

|                                           |     |       |       |       |       |
|-------------------------------------------|-----|-------|-------|-------|-------|
| Almonds, plain                            |     |       |       |       |       |
| Sunflower seeds                           |     |       |       |       |       |
| Peanut butter, no added salt or sugar     |     |       |       |       |       |
| Peanuts, plain                            |     |       |       |       |       |
| Sesame Seeds                              | 50  |       |       |       |       |
| Edamame, frozen                           |     |       |       |       |       |
| Seed,sesame butter, Tahini                |     |       |       |       |       |
| Pumpkin seeds                             |     |       |       |       |       |
| Hummus dip                                | 100 | 48-98 | 48-98 | 48-98 | 24-72 |
| Masala vegetarian patty                   |     |       |       |       |       |
| Baked Beans 50% less sugar                | 135 |       |       |       |       |
| Tofu                                      |     |       |       |       |       |
| Middle Eastern Falafel Lisa               |     |       |       |       |       |
| Black Beans Canned                        |     |       |       |       |       |
| Chickpeas, canned                         | 150 |       |       |       |       |
| Lentils, canned in springwater            |     |       |       |       |       |
| Red Kidney Beans, canned                  |     |       |       |       |       |
| Four Bean Mix, canned                     |     |       |       |       |       |
| <b>FATS &amp; OILS</b>                    |     |       |       |       |       |
| Olive oil                                 | 10  | 14-30 | 14-30 | 14-30 | 14-30 |
| Canola oil                                |     |       |       |       |       |
| <b>DISCRETIONARY FOODS</b>                |     |       |       |       |       |
|                                           | 0   |       |       |       |       |
| <b>SAUCES, DRESSINGS, SPREADS, SUGARS</b> |     |       |       |       |       |
| Marmite                                   | 15  | 8-24  | 8-24  | 8-24  | 8-24  |
| Mild Salsa                                |     |       |       |       |       |
| <b>BEVERAGES</b>                          |     |       |       |       |       |
|                                           | 0   |       |       |       |       |

|                   |   |    |    |    |    |
|-------------------|---|----|----|----|----|
| <b>TAKEAWAYS</b>  | 0 |    |    |    |    |
| <b>ALCOHOL</b>    | 0 |    |    |    |    |
| <b>SUPPLEMENT</b> |   |    |    |    |    |
| Vitamin B12       | 1 | 14 | 14 | 14 | 14 |
